# Supplementary figures and images for: Antifungal Activities of Volatile Secondary Metabolites of Four Diaporthe Strains Isolated from Catharanthus roseus
Source: MDPI journal article supplement (doi:10.3390/jof4020065), 2018-05-30

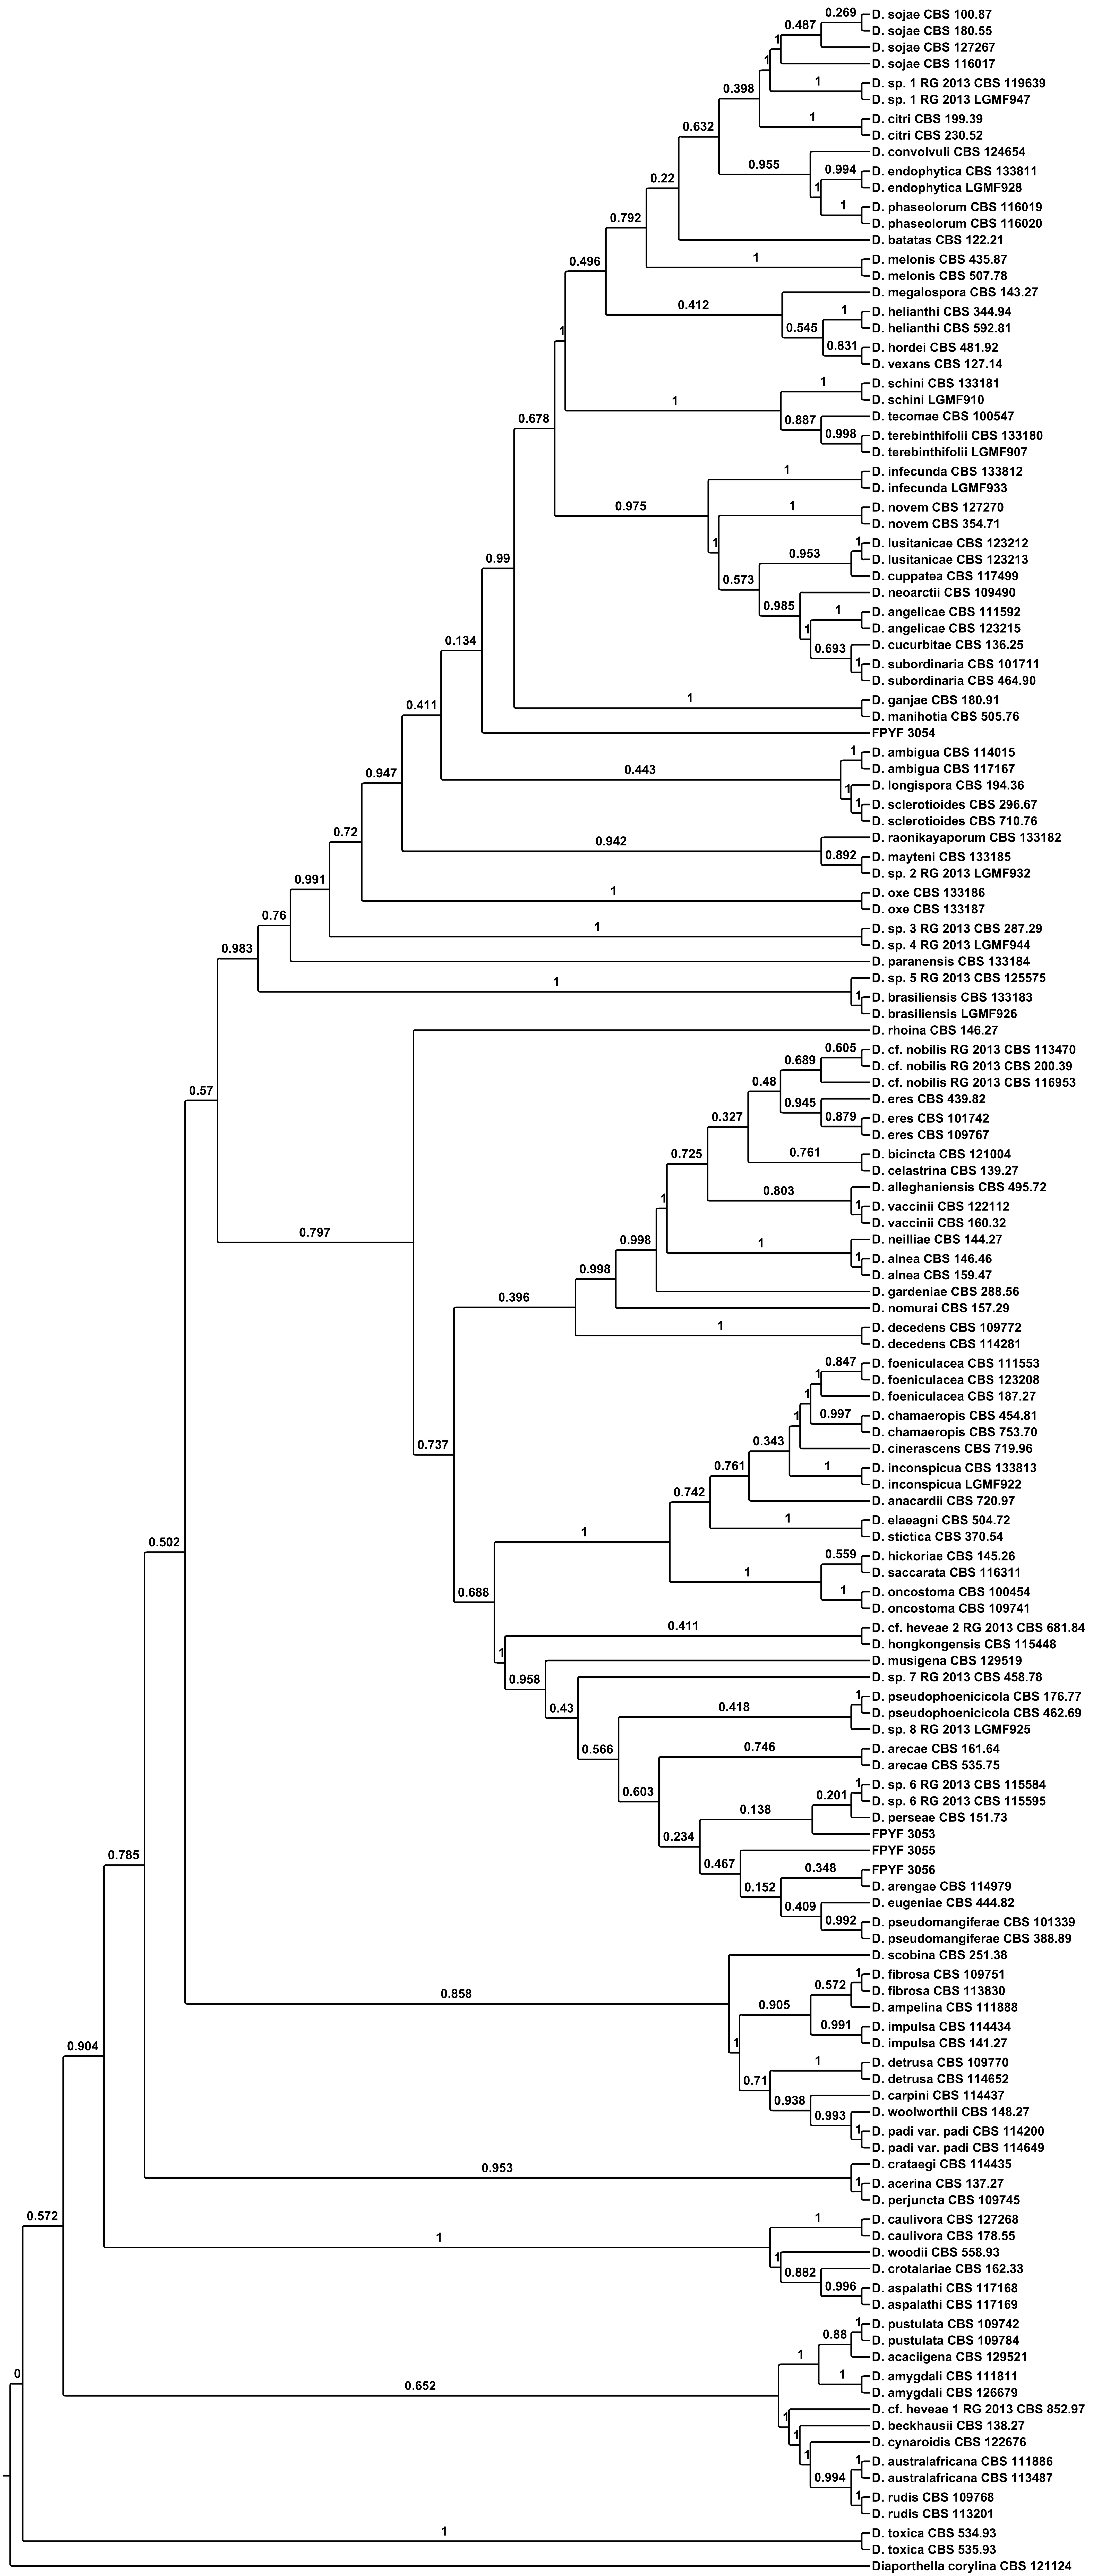

Supplement: s1 [file s1]

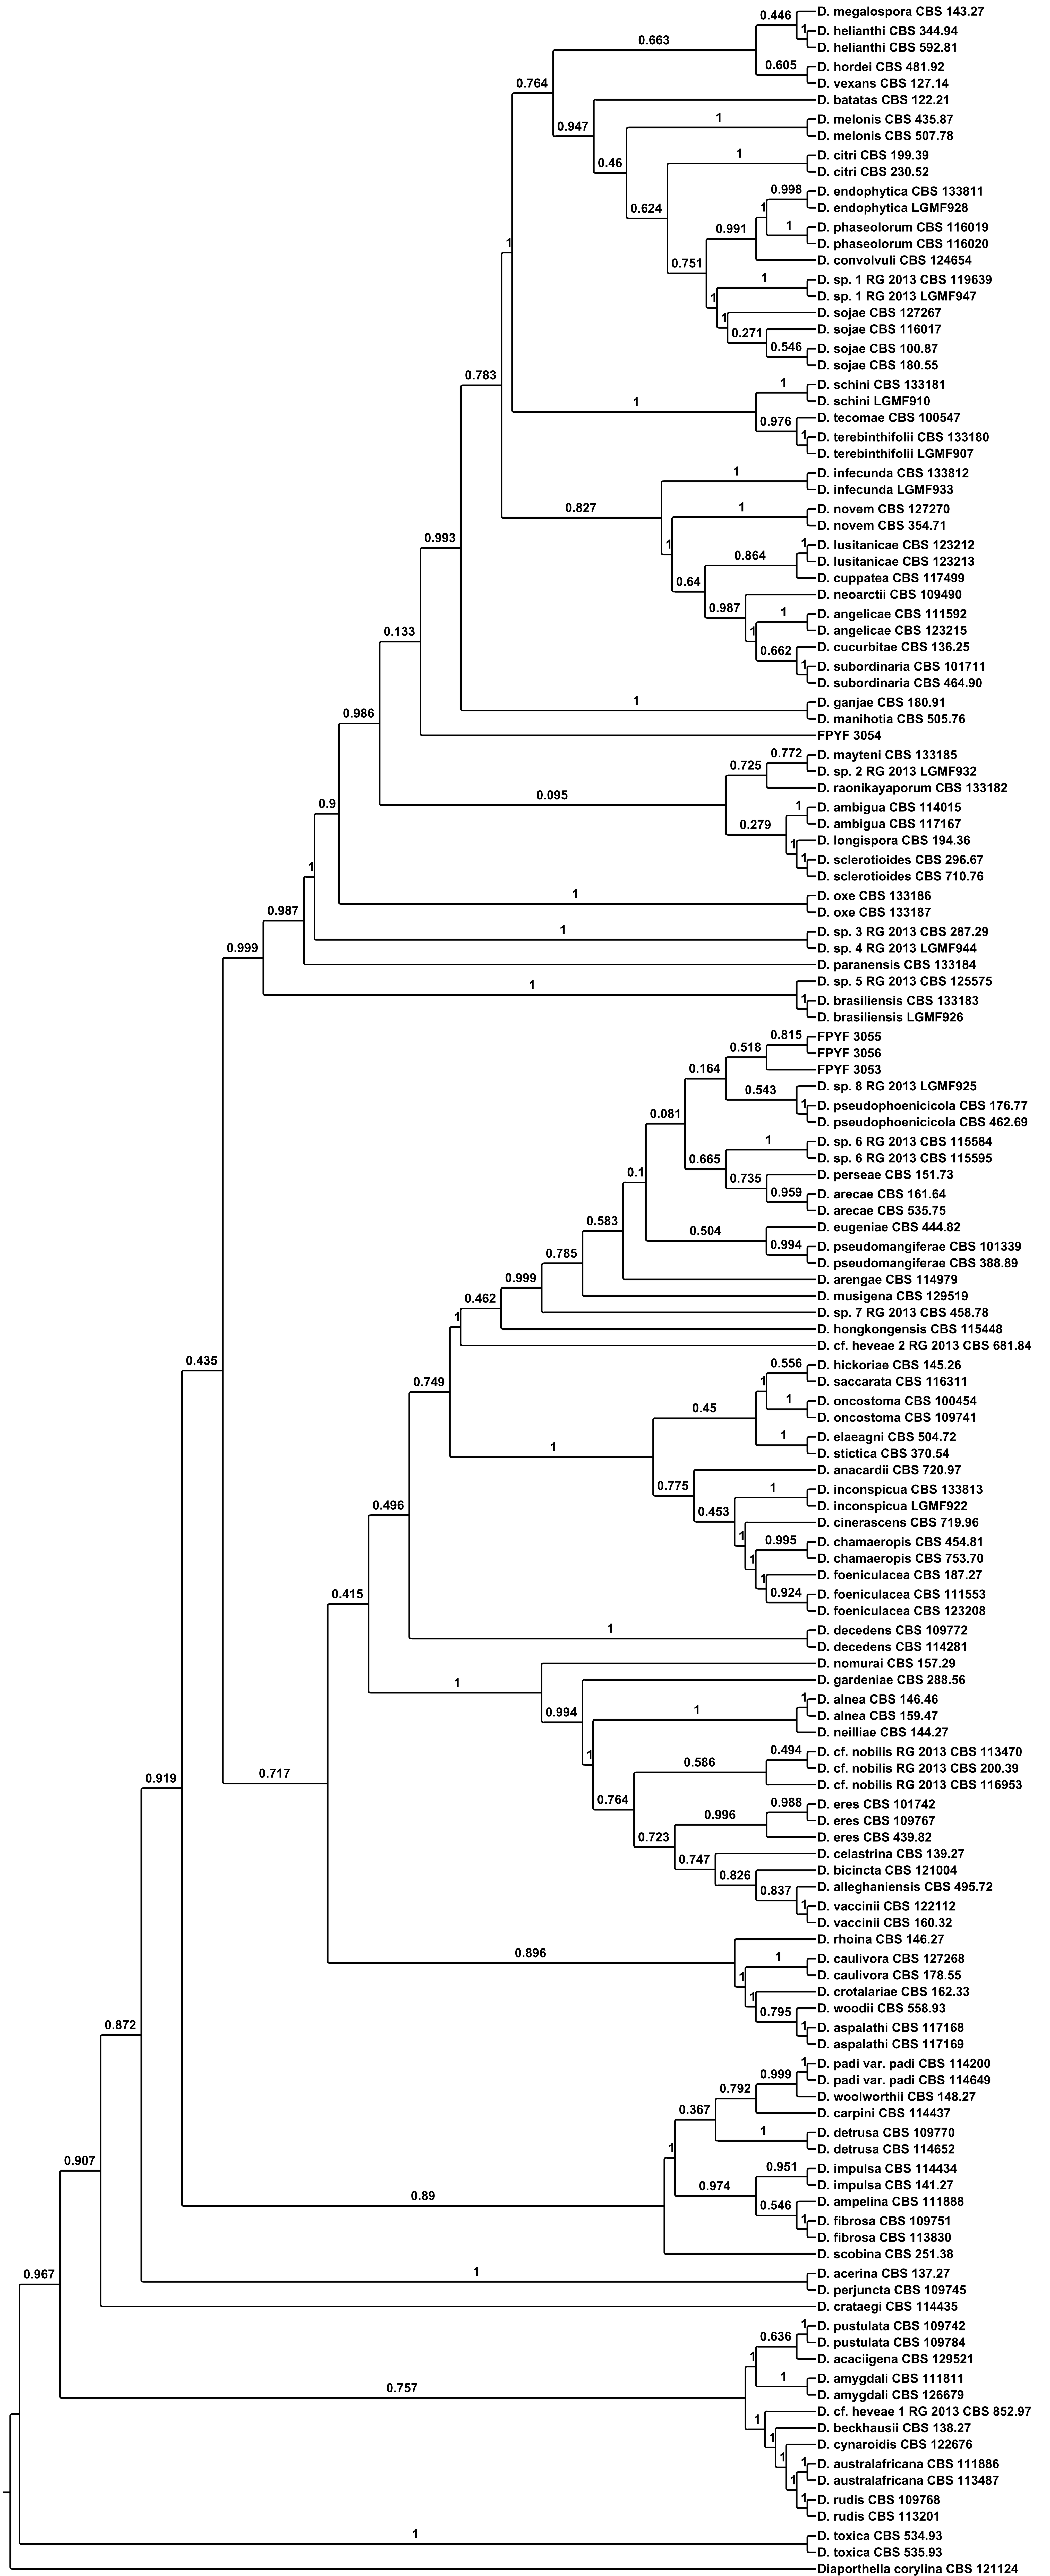

Supplement: s1 [file s1]
